# Supplementary material for: CKD Awareness in the General Population: Performance of CKD-Specific Questions
Source: PubMed Central journal article supplement — Kidney Med. 2019 Feb 25;1(2):43–50. doi: 10.1016/j.xkme.2019.01.005 (PMC7380399; doi:10.1016/j.xkme.2019.01.005), 2019-02-25

**Figure S1: Timeline of study visits for the Healthy Aging in Neighborhoods of Diversity across the Life Span (HANDLS) study**

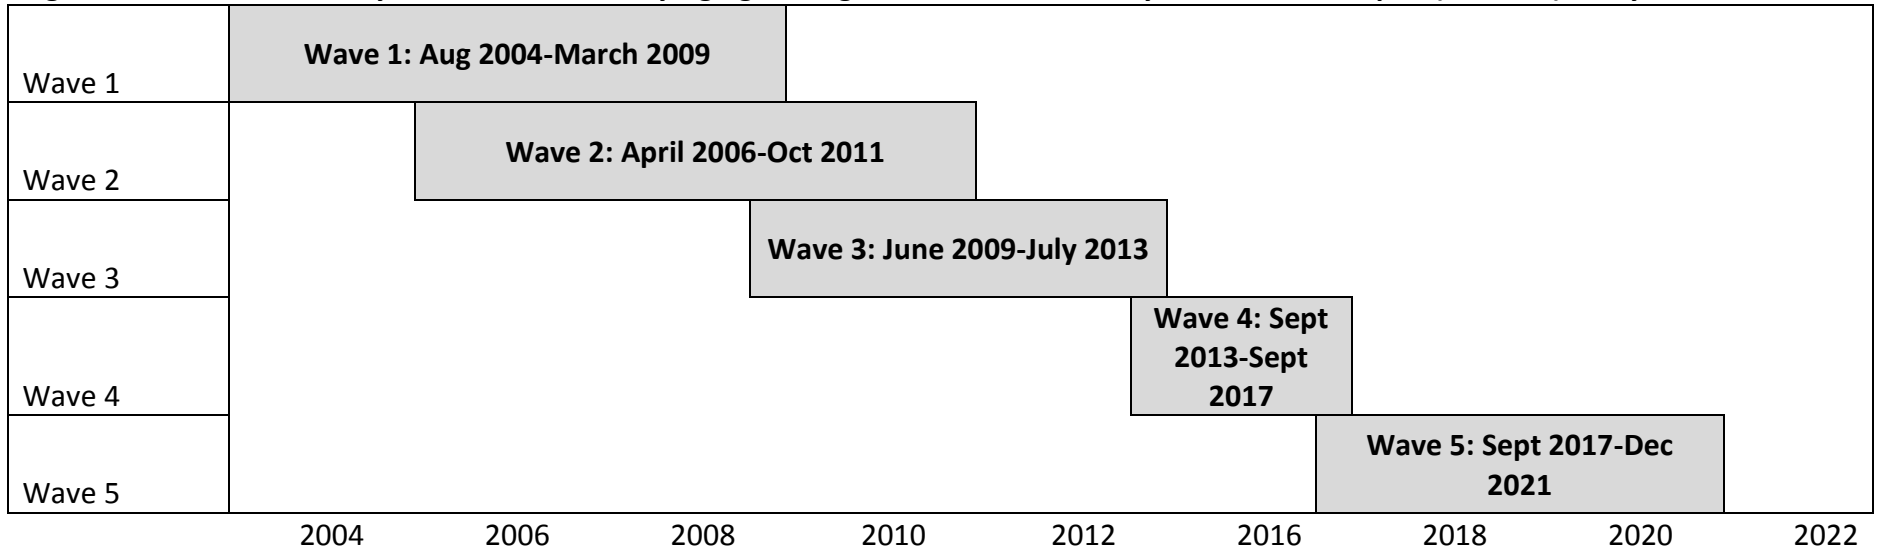

Supplement: mmc1.pdf [file mmc1.pdf]
